# Supplementary material for: Identifying Wood Based on Near-Infrared Spectra and Four Gray-Level Co-Occurrence Matrix Texture Features
Source: MDPI journal article supplement (doi:10.3390/f12111527), 2021-11-05
Supplement: s1 [file s1]

**Table S1.** The sample representative images of all timbers in this paper

|                    |                         |                          |                       |                           |                          |                             |                         |
|--------------------|-------------------------|--------------------------|-----------------------|---------------------------|--------------------------|-----------------------------|-------------------------|
| Transverse section |                         |                          |                       |                           |                          |                             |                         |
| Radial section     |                         |                          |                       |                           |                          |                             |                         |
| Tangential section |                         |                          |                       |                           |                          |                             |                         |
|                    | <i>Hymenaea</i> sp.     | <i>Newtonia</i> sp.      | <i>Xylia</i> sp.      | <i>Intsia</i> sp.         | <i>Manilkara</i> sp.     | <i>Piptadeniastrium</i> sp. | <i>Gluta</i> sp.        |
| Transverse section |                         |                          |                       |                           |                          |                             |                         |
| Radial section     |                         |                          |                       |                           |                          |                             |                         |
| Tangential section |                         |                          |                       |                           |                          |                             |                         |
|                    | <i>Acacia</i> sp.       | <i>Koompassia</i> sp.    | <i>Madhuca</i> sp.    | <i>Myroxylon balsamum</i> | <i>Tabebuia</i> sp.1     | <i>Tabebuia</i> sp.2        | <i>Swintonia</i> sp.    |
| Transverse section |                         |                          |                       |                           |                          |                             |                         |
| Radial section     |                         |                          |                       |                           |                          |                             |                         |
|                    | <i>Cylicodiscus</i> sp. | <i>Dracontomelon</i> sp. | <i>Pericopsis</i> sp. | <i>Sterospermum</i> sp.   | <i>Erythrophleum</i> sp. | <i>Planchonella</i> sp.     | <i>Pterocarpus</i> sp.1 |
| Transverse section |                         |                          |                       |                           |                          |                             |                         |
| Radial section     |                         |                          |                       |                           |                          |                             |                         |

Tangential  
section

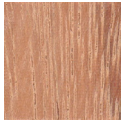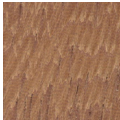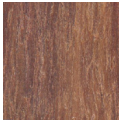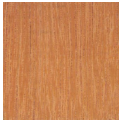

---

*Dipteryx* sp.

*Dicorynia* sp.

*Pterocarpus*  
sp.2

*Apuleia* sp.

---
